# Supplementary material
Source: PubMed Central journal article supplement (PMC5892844)

**A** Top 10 Genes Expressed

| Tape Strip      | Epidermis    | Dermis        |
|-----------------|--------------|---------------|
| <i>KRT10</i>    | <i>KRT10</i> | <i>KRT10</i>  |
| <i>KRT14</i>    | <i>KRT14</i> | <i>KRT14</i>  |
| <i>FLG</i>      | <i>KRT2</i>  | <i>KRT5</i>   |
| <i>SPRR2E</i>   | <i>KRT5</i>  | <i>ACTB</i>   |
| <i>KRTAP1-5</i> | <i>KRT1</i>  | <i>DCN</i>    |
| <i>KRT5</i>     | <i>ACTG1</i> | <i>ACTG1</i>  |
| <i>KRTAP4-9</i> | <i>FLG</i>   | <i>COL1A1</i> |
| <i>FLG2</i>     | <i>DSG1</i>  | <i>KRT1</i>   |
| <i>KRT86</i>    | <i>ACTB</i>  | <i>DSP</i>    |
| <i>KRT17</i>    | <i>PTMA</i>  | <i>KRT2</i>   |

**C** Top 10 Cellular Component GO Enrichments

| Tape Strip                       | Epidermis                        | Dermis                           |
|----------------------------------|----------------------------------|----------------------------------|
| Extracellular Vesicular Exosome  | Extracellular Vesicular Exosome  | Extracellular Vesicular Exosome  |
| Anchoring Junction               | Anchoring Junction               | Anchoring Junction               |
| Cell-Substrate Junction          | Cell-Substrate Junction          | Adherens Junction                |
| Focal Adhesion                   | Adherens Junction                | Cell-Substrate Junction          |
| Cell-Substrate Adherens Junction | Focal Adhesion                   | Focal Adhesion                   |
| Adherens Junction                | Cell-Substrate Adherens Junction | Cell-Substrate Adherens Junction |
| Intermediate Filament            | Desmosome                        | Extracellular Matrix             |
| Keratin Filament                 | Cell-Cell Junction               | Contractile Fiber Part           |
| Cornified Envelope               | Cornified Envelope               | Cell-Cell Junction               |
| Desmosome                        | Intermediate Filament            | Cortical Cytoskeleton            |

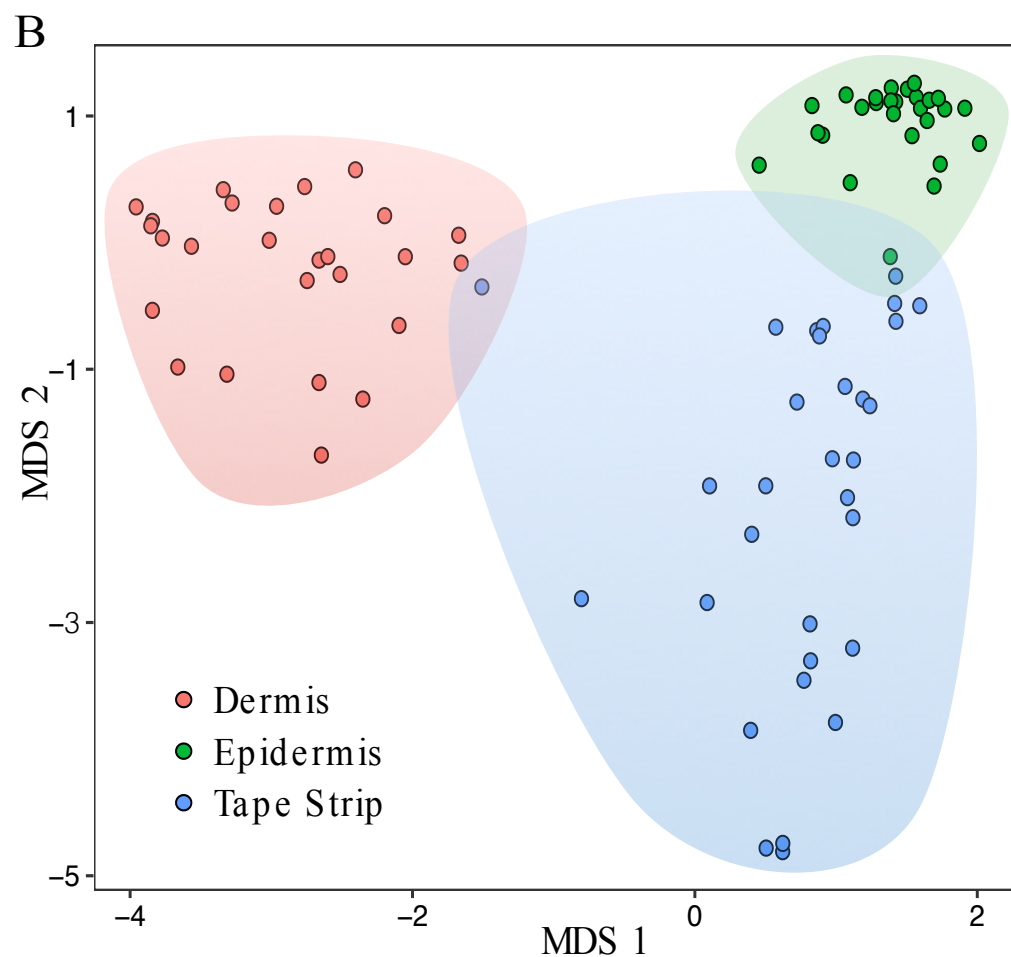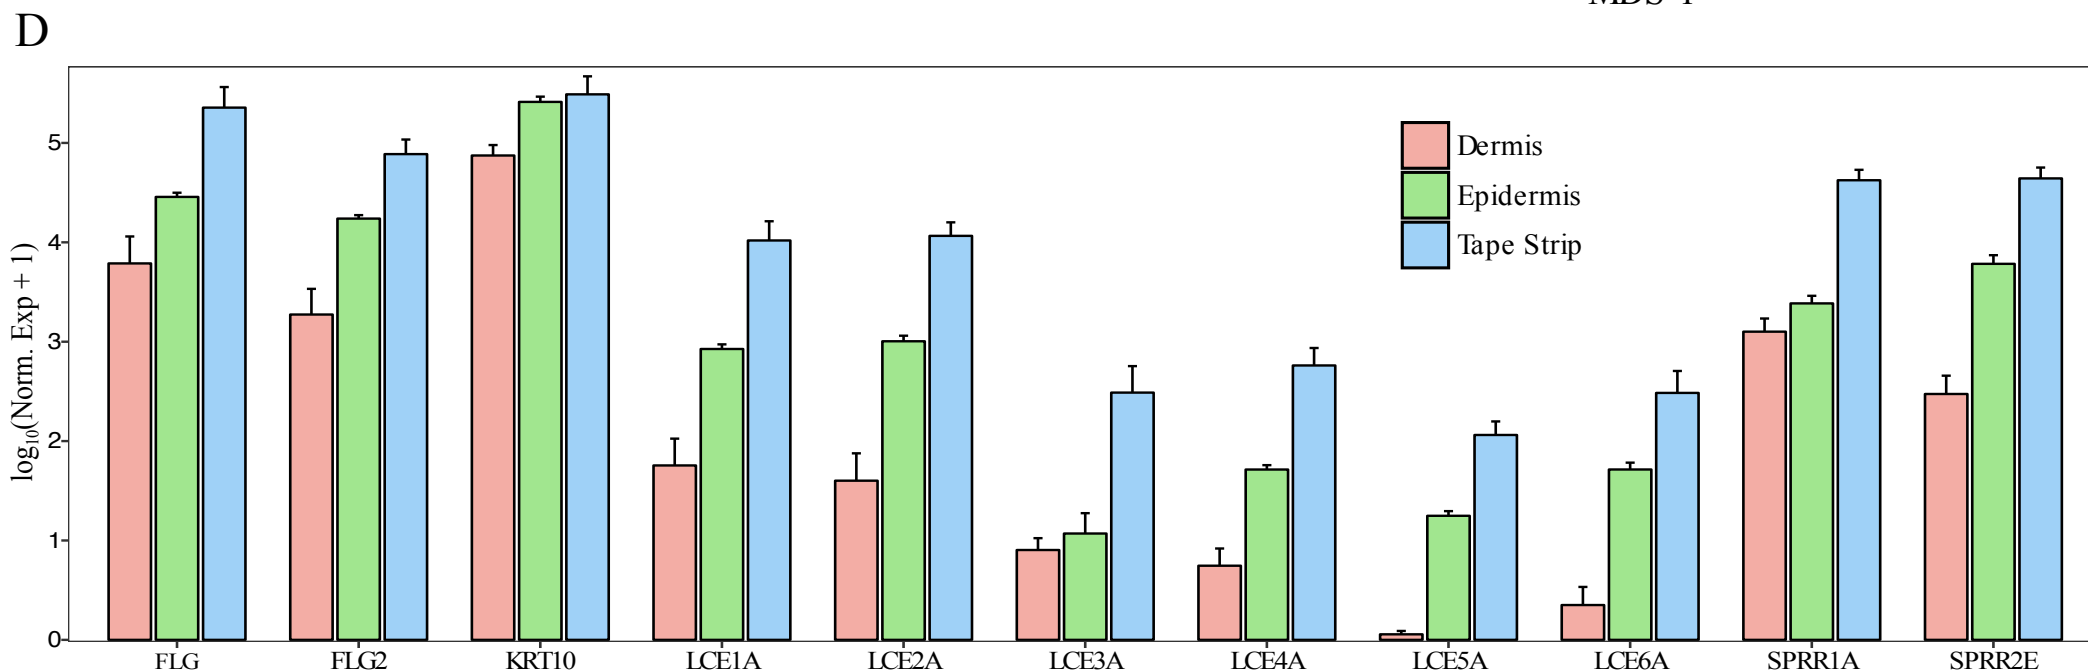

Supplement: NIHMS943288-supplement-2.pdf [file NIHMS943288-supplement-2.pdf]
