# Supplementary material
Source: PubMed Central journal article supplement (PMC5892844)

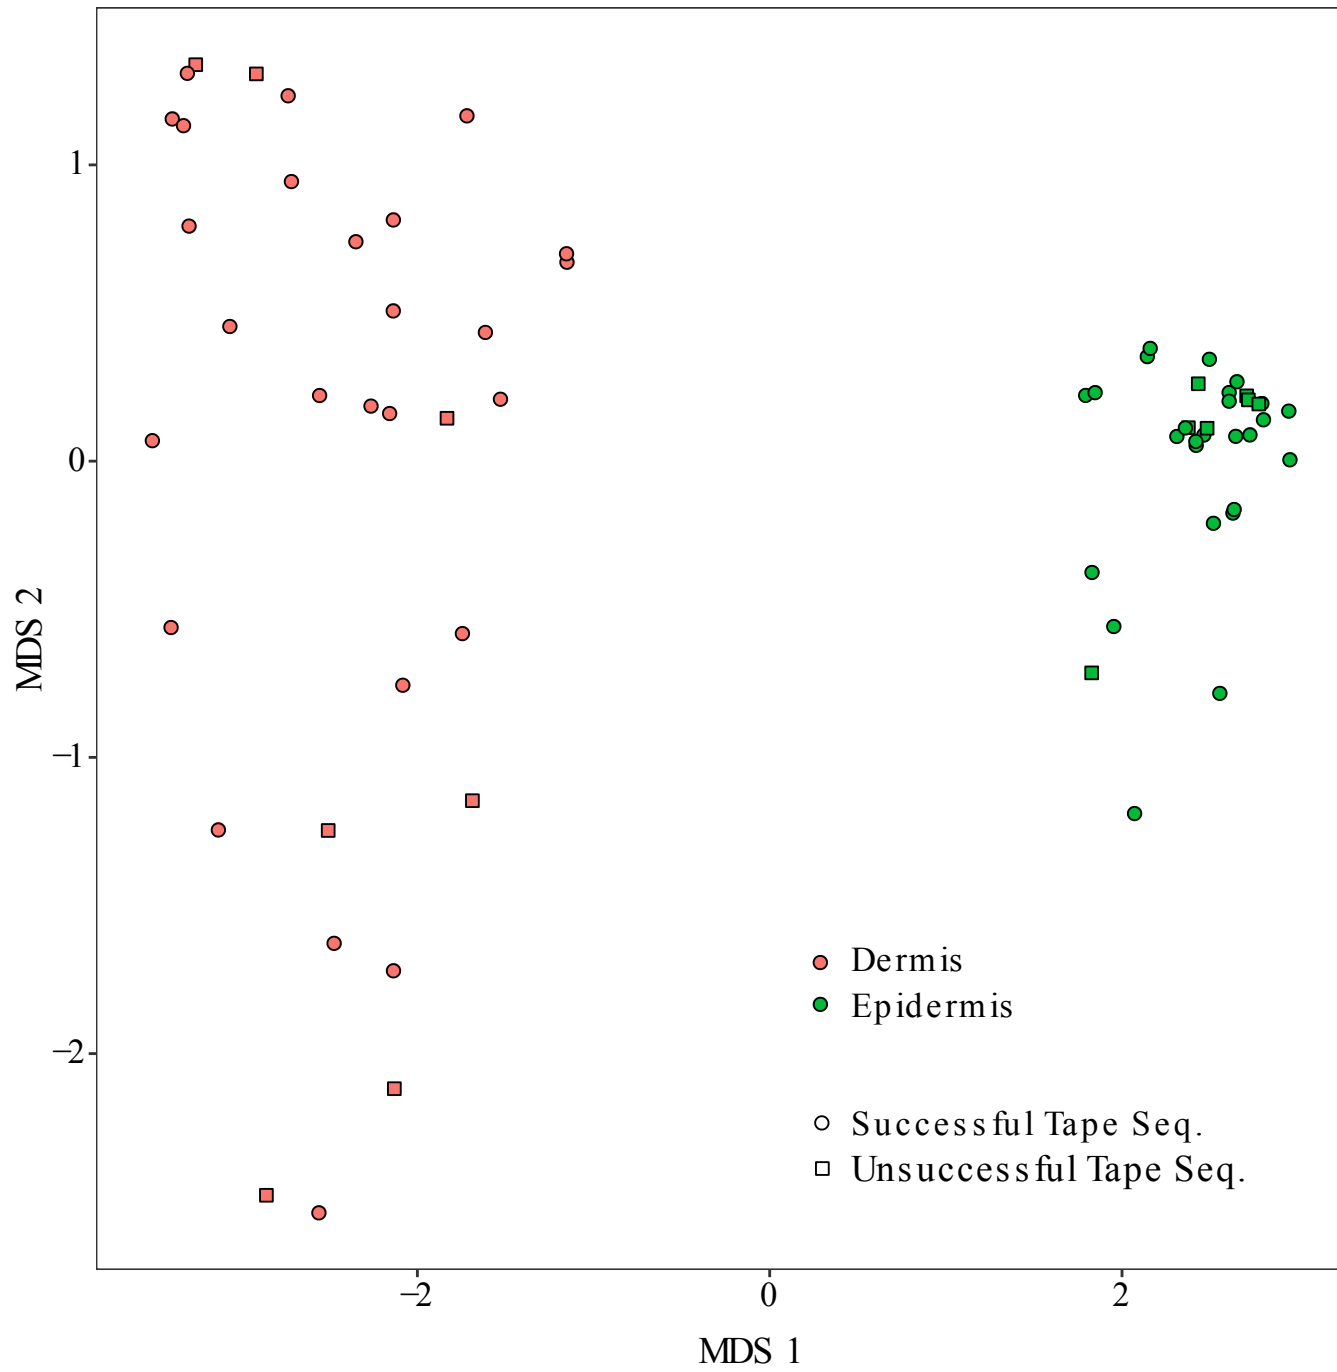

Supplement: NIHMS943288-supplement-3.pdf [file NIHMS943288-supplement-3.pdf]
